# Supplementary material for: Temporal and spatial variation of petroleum hydrocarbons and microbial communities during static release of oil pollution sediments
Source: Frontiers journal article supplement (doi:10.3389/fmars.2022.1025612), 2022-09-23
Supplement: Data_Sheet_1.docx [file Data_Sheet_1.docx]

**Temporal and spatial variation of petroleum hydrocarbons and microbial communities during static release of oil pollution sediments**

Haoshuai Li a, b, Hu Sun a, b, Xinping Wang c, Fujuan Li c, Lixin Cao c,Yang Li d, Ranran Dong a, b, Yuxiang Sun a, b, Peiyan Sun c[[1]](#footnote-1)*, Mutai Bao a, b[[2]](#footnote-2)*

*a Frontiers Science Center for Deep Ocean Multispheres and Earth System, and Key Laboratory of Marine Chemistry Theory and Technology, Ministry of Education, Ocean University of China, Qingdao, China*

*b College of Chemistry and Chemical Engineering, Ocean University of China, Qingdao, China*

*C North China Sea Environmental Monitoring Center, State Oceanic Administration, Qingdao, China*

*d China Petrochemical Corporation (Sinopec Group), Beijing, China*

**Fig.S1** Schematic diagram of the experimental device for simulating the static release process

**Fig.S2** Changes in the release concentration of oily sediments with aging time

**Fig.S3** C1-P relative peak area change diagram of U crude oil at different heights

**Fig.S4** C1-P relative peak area change diagram of R crude oil at different heights

**Fig.S5** C1-P relative peak area change diagram of T crude oil at different heights

**Fig.S6** Comparison of microbial communities between the original sediment and the freeze-dried sediment

**Fig.S7** Comparison of microbial communities in the four columns and freeze-dried

**Table.S1** Physicochemical information of three crude oils

**Table.S2** The Physicochemical information of Sediments

**Table.S3** Main characteristic ions

**Table.S4** Microbial phyla and relative abundance in natural seawater

# Support material

**Fig.S1** Schematic diagram of the experimental device for simulating the static release process

**Fig. S2** Changes in the release concentration of oily sediments with aging time

**Fig.S3** C1-P relative peak area change diagram of U crude oil at different heights

At 1 h, the C1-P content at the bottom was the highest, followed by the middle and surface layers and finally the upper layer. As time increased, the release of C1-P at the bottom first decreased and then raised. The middle part was similar to the bottom, and the release of C1-P in the surface and upper layers slowly raised. The release of C1-P in different heights all decreased after 24 h, and reached the lowest level of 0 after 72 h (Fig. S3)..

**Fig. S4** C1-P relative peak area change diagram of R crude oil at different heights

At 1 h, the C1-P content of the surface layer was the highest, followed by the upper layer, the middle, and finally the bottom. With the increase of time, the release of C1-P at the surface, upper and middle parts firstly decreased and then increased, while the release of C1-P at the bottom slowly increased. The peak of C1-P release in the middle and bottom was the same, and the peak reached by the surface and the upper layer was the same. The ratio of the two peaks was 1:2, so it was inferred that when C1-P is released from the bottom to the upper height, the arrival time of the middle was fast, Followed by the upper layer and the surface layer. After reaching the peak, the surface layer, upper layer, and middle layer decrease due to the decrease of the bottom release amount. Then, as the bottom release volume continues to increase, the content of the remaining heights (except for the slow decrease of the surface layer content) also increases (Fig. S4).

**Fig. S5** C1-P relative peak area change diagram of T crude oil at different heights

At 1 h, the C1-P content in the surface layer was the highest, followed by the upper layer, the bottom layer, and the middle layer last. With the increase of time, the release of C1-P in the surface layer and the upper layer first decreased and then increased, while the release of C1-P in the middle layer and the bottom layer slowly increased. The peak of C1-P release in the middle and bottom was the same, and the peak reached by the surface and the upper layer was the same. The ratio of the two peaks was 1:2, so it is inferred that when C1-P was released from the bottom to the upper height, the arrival time of the middle is fast, followed by the upper layer and the surface layer. After reaching the peak, due to the decrease of the bottom release, the surface, upper and middle layers will decrease accordingly (Fig. S5).

**Fig. S6** Comparison of microbial communities between the original sediment and the freeze-dried sediment

**Fig. S7** Comparison of microbial communities in the four columns and freeze-drie

Table. S1 Physicochemical information of three crude oils

| **Oil category** | **Viscosity**  **(mPa·S)**  **25℃** | **Emulsification rate (%)** | | **Saturation**  **(%)** | **Aromatics**  **(%)** | **Asphaltene**  **(%)** | **Colloid**  **(%)** | **The wax content**  **(%)** |
| --- | --- | --- | --- | --- | --- | --- | --- | --- |
| **25℃** | |
| **30 s** | **10 min** |
| **R** | 736.3 | 88.2 | 74.6 | 64.0 | 21.6 | 1.3 | 17.2 | 7.1 |
| **U** | 1147.8 | 59.8 | 54.6 | 82.3 | 11.0 | 0.8 | 9.8 | 17.0 |
| **T** | 12985.0 | 98.2 | 79.2 | 45.3 | 30.3 | 3.7 | 23.5 | 1.5 |

Table. S2 The Physicochemical information of Sediments

| **Grain size content (%)** | | | | **Name of granularity** | **Oil**  **(**mg/L**)** | **Organic carbon**  **(**mL/L**)** |
| --- | --- | --- | --- | --- | --- | --- |
| **Gravel**  **(4000 ~ 2000µm)** | **Sand**  **(2000 ~ 63µm)** | **Silt (63 ~ 4µm)** | **Clay (< 4µm)** |
| 0.00 | 57.75 | 42.25 | 0.00 | Silty sand | 20.3×10-6 | 0.50×10-6 |

**Table. S3** Main characteristic ions

| **Component name** |  | **m/z** |
| --- | --- | --- |
| Normal Alkanes (Pr and Ph) |  | 85 |
| Major polycyclic aromatic hydrocarbons | Naphthalene series | 128、142、156、170、184 |
|  | Phenanthrene series | 178、192、206、220、234 |
|  | Dibenzothiophene series | 184、198、212、226、240 |
|  | Fluorene Series | 166、180、194、208 |
|  | Benzoanthrocene/Chrysene Series | 228、242、256、270 |
| C30 Horane |  | 191 |

**Table. S4** Microbial phyla and relative abundance in natural seawater

| **Microorganism** | **Relative abundance （%）** |
| --- | --- |
| Proteobacteria | 0.839585 |
| Bacteroidetes | 0.092905 |
| Cyanobacteria | 0.044244 |
| Actinobacteria | 0.011097 |
| Planctomycetes | 0.003284 |
| unidentified_Bacteria | 0.002037 |
| Verrucomicrobia | 0.002257 |
| Firmicutes | 0.001117 |
| Chloroflexi | 0.0006 |
| Euryarchaeota | 0.000638 |
| Others | 0.002235 |

1. * Corresponding authors: Mutai Bao. E-mail address: mtbao@ouc.edu.cn (M. Bao). Tel/Fax:+86-532-66782509. Postal address: No. 238 Songling Road, Qingdao, Shandong Province, China, 266100. Peiyan Sun. E-mail address: [sunpeiyan@ncs.mnr.gov.cn](mailto:sunpeiyan@ncs.mnr.gov.cn) (Y. Sun). Postal address: No. 22 Fushun Road, Qingdao, Shandong Province, China, 266033. [↑](#footnote-ref-1)
2. [↑](#footnote-ref-2)
